# Supplementary material
Source: PubMed Central journal article supplement (PMC6086602)
Supplement: NIHMS979033-supplement-5.pdf [file NIHMS979033-supplement-5.pdf]

## Supplemental Materials

# Quantifying nucleation *in vivo* reveals the physical basis of prion-like phase behavior

Tarique Khan, Tejbir S. Kandola, Jianzheng Wu, Shriram Venkatesan, Ellen Ketter, Jeffrey J. Lange, Alejandro Rodríguez Gama, Andrew Box, Jay R. Unruh, Malcolm Cook, and Randal Halfmann



## Figure S1. Technical details and controls for DAmFRET, related to Fig. 1.

- (A) Autofluorescence accurately distinguishes live from dead cells. Yeast cells expressing mEos3.1 (not photoconverted) were stained with Sytox Far Red. A histogram of Sytox intensity for single cells is shown on the left, and the Sytox-positive population (“dead”) is colored red in the dot plot of blue autofluorescence (405 nm excitation, 457/45 nm emission) vs. mEos3.1 (donor) intensity on the right. Based on this relationship, DAmFRET experiments excluded the population with blue autofluorescence and lacking detectable mEos3.1 fluorescence.
- (B) The indicated proteins were expressed in isogenic [psi-] [pin-] or [PSI+] [PIN+] strains and tested for donor intensity prior to photoconversion and then for acceptor intensity following photoconversion. Samples containing amyloid are indicated in red; non-amyloid structured assemblies in blue; and unstructured or monomer in black. The linear regression ( $R^2 = 0.9728$ ) indicates that mEos3.1 photoconversion is independent of fusion, expression level, or structure of the mEos3.1-tagged query protein.
- (C) Density plot showing tight correlation of donor and acceptor fluorescence of mEos3.1 following the photoconversion step.
- (D) Left-right: A sample image of Spc42-mEos3.1 from the ImageStream®x MkII, a 2D density histogram showing the relationship between Spc42 spot size and peak amplitude showing the selected population for analysis, and a plot of the peak amplitude of beads on the ImageStream as a function of objective focus Z Shift showing the shape of the focal volume (See Methods).
- (E) Left: histograms of Spc42-mEos3.1 peak amplitude at different laser powers and Right: the trend of the centers of these histogram peaks (See Methods).
- (F) Representative images of High-FRET cells from DAmFRET data of ASC. The panels are (left to right) donor, FRET, acceptor, and bright field merged with acceptor signal.
- (G) DAmFRET plot of cells expressing mEos3.1 without a fusion partner.



**Figure S2. Corresponding DAmFRET plots of the curve fits shown in Fig. 2D, related to Fig. 2.** (left to right) DAmFRET plots of Sup35 PrD in cells containing decreasing strengths of the heterotypic nucleator [ $PIN^+$ ] showing increasing concentration dependence.



**Figure S3. Additional characterization of prion and prion-like proteins, related to Fig. 3.**

(A) Images of cells acquired by imaging flow cytometry. The cells were selected from high or low-AmFRET populations within the same concentration range, expressing the indicated protein from (A). Representative images for each population are shown. BF, Bright Field.

(B) Representative images showing ThT-stained cells expressing Sla1 PrL or Ngr1 PrL.

(C) DAmFRET plots of known yeast prion-forming sequences and of Ngr1 PrL and Sla1 PrL.

(D) DAmFRET of the PrD of a well-characterized fungal prion HET-s and its known hypomorphic mutant W287A. The inset shows  $\delta \pm$  error. \*The  $\delta$  value for W287A is likely underestimated due to the Weibull function necessitating that the high AmFRET fraction goes to 1.



**Figure S4. Additional characterization of Sup35 PrD liquid droplets, related to Fig. 4.**

(A) DAmFRET plots and the indicated gates used for the quantification of mean AmFRET shown in Fig. 4A.

(B) Intensity (arbitrary units) of the two puncta indicated by arrows in Fig. 4E immediately before (red and blue bar) and after (purple bar) coalescing with each other.

(C) Bar graphs depicting the quantification of FCS, with the molecular brightness of GFP in cells expressing 1x GFP or endogenous, full-length Sup35 fused to GFP. See Methods for details.



**Figure S5. Additional characterization of Sup35 PrD variants, related to Fig. 5.**

(A) DAmFRET plots of Sup35 PrD mutants and scrambled variants, as an extension of those shown in Fig. 5A.

(B) DAmFRET of Sup35 PrDQ in cells with different endogenous amyloid templates ([PIN<sup>+</sup>], [PSI<sup>+</sup>weak], or [PSI<sup>+</sup>strong]) in comparison with that of Sup35 PrD WT. Mean AmFRET values are denoted as  $\mu$ .

(C) Representative confocal images depicting ThT staining in cells expressing Sup35 PrDQ or Sup35 PrD #24.

(D) SDD-AGE of Sup35 PrD #24 and Sup35 PrDQ expressed in [PIN<sup>+</sup>] or [pin<sup>-</sup>] cells, along with WT Sup35 PrD as a positive and negative control for amyloid. The dashed line indicates the two adjacent lanes shown are spliced from different positions in the gel. Alternate lanes were intentionally left blank.

Movie S1. Time-lapse microscopy of cells expressing ASC-mEos3.1, related to Fig. 1E.

Movie S2. Time-lapse microscopy of Sup35 PrD-mEos3.1-expressing cells in the absence of stress, related to Fig. 4F.

Movie S3. Time-lapse microscopy of Sup35 PrD-mEos3.1-expressing cells treated with NaAsO<sub>2</sub>, related to Fig. 4F.

Movie S4. Time-lapse microscopy of Sup35 PrD-mEos3.1-expressing cells treated with antimycin + 2-deoxyglucose, related to Fig. 4F.

Table S1. Parameters of fits from DAMFRET datasets, related to figures 1-6.

| experiment                        | protein           | yeast strain                     | EC <sub>50</sub> (μM) | EC <sub>50</sub> SE | C <sub>min</sub> (μM) | C <sub>min</sub> SE | δ     | δ SE |
|-----------------------------------|-------------------|----------------------------------|-----------------------|---------------------|-----------------------|---------------------|-------|------|
| [PIN <sup>+</sup> ] isoforms      | Sup35 PrD         | rhy1967‡ [PIN <sup>+High</sup> ] | 22.9                  | 0.17                | 1.67                  | 0.46                | 0.74  | 0.02 |
|                                   | Sup35 PrD         | rhy1966‡ [PIN <sup>+Med</sup> ]  | 8.92                  | 0.05                | 3.06                  | 0.24                | 1.04  | 0.04 |
|                                   | Sup35 PrD         | rhy1965‡ [PIN <sup>+Low</sup> ]  | 2.33                  | 0.16                | 1.78                  | 0.38                | 1.59  | 0.23 |
| [PIN <sup>+</sup> ] cross-seeding | Sup35 PrD         | rhy1713                          | 13.25                 | 0.33                | 0.00                  | 1.59                | 0.90  | 0.11 |
|                                   | Sup35 PrD*        | rhy1852                          | N/D                   | N/D                 | N/D                   | N/D                 | N/D   | N/D  |
|                                   | Ure2 PrD*         | rhy1713                          | N/D                   | N/D                 | N/D                   | N/D                 | N/D   | N/D  |
|                                   | Ure2 PrD*         | rhy1852                          | N/D                   | N/D                 | N/D                   | N/D                 | N/D   | N/D  |
|                                   | Mot3 PrD          | rhy1713                          | 8.66                  | 0.07                | 1.17                  | 0.66                | 0.50  | 0.05 |
|                                   | Mot3 PrD          | rhy1852                          | 43.47                 | 0.63                | 13.59                 | 2.15                | 0.63  | 0.06 |
|                                   | Swi1 PrD          | rhy1713                          | 104.96                | 1.39                | 15.22                 | 5.74                | 0.58  | 0.05 |
|                                   | Swi1 PrD*         | rhy1852                          | N/D                   | N/D                 | N/D                   | N/D                 | N/D   | N/D  |
|                                   | Cyc8 PrD          | rhy1713                          | 38.20                 | 0.36                | 0.00                  | 0.69                | 0.99  | 0.03 |
|                                   | Cyc8 PrD          | rhy1852                          | 50.10                 | 0.31                | 3.17                  | 1.09                | 0.72  | 0.02 |
|                                   | Ngr1 PrL          | rhy1713                          | 39.08                 | 0.10                | 3.36                  | 1.90                | 0.30  | 0.02 |
|                                   | Ngr1 PrL          | rhy1852                          | 45.49                 | 0.20                | 1.65                  | 2.91                | 0.27  | 0.03 |
|                                   | Rnq1*             | rhy1713                          | N/D                   | N/D                 | N/D                   | N/D                 | N/D   | N/D  |
| Rnq1                              | rhy1852           | 88.01                            | 1.69                  | 0.00                | 9.48                  | 0.40                | 0.07  |      |
|                                   | ASC               | rhy1713                          | 23.70                 | 0.09                | 1.24                  | 0.80                | 0.38  | 0.02 |
|                                   | HET-s PrD         | rhy1713                          | 33.41                 | 1.10                | 3.41                  | 0.75                | 0.44  | 0.01 |
|                                   | HET-s PrD (W287A) | rhy1713                          | 162.00                | 6.70                | 13.00                 | 2.90                | 0.55  | 0.05 |
|                                   | sesA              | rhy1713                          | 249.00                | 0.85                | 0.00                  | 2.16                | 0.49  | 0.01 |
| Sup35 PrD mutants                 | WT                | YJW1178 <sup>‡</sup>             | 18.48                 | 0.52                | 0.00                  | 1.08                | 0.67  | 0.09 |
|                                   | Y46K+Q47K         | YJW1178 <sup>‡</sup>             | 99.38                 | 0.93                | 99.38                 | 0.93                | 0.54  | 0.03 |
|                                   | Q61K+Q62K         | YJW1178 <sup>‡</sup>             | 51.12                 | 1.64                | 51.12                 | 1.64                | 0.42  | 0.18 |
| Sup35 PrD scrambles               | WT                | rhy1713                          | 14.00                 | 0.12                | 4.45                  | 0.19                | 1.04  | 0.03 |
|                                   | #21               | rhy1713                          | 24.20                 | 0.11                | 5.13                  | 0.19                | 0.82  | 0.01 |
|                                   | #24 <sup>†</sup>  | rhy1713                          | N/D                   | N/D                 | N/D                   | N/D                 | N/D   | N/D  |
|                                   | #25*              | rhy1713                          | N/D                   | N/D                 | N/D                   | N/D                 | N/D   | N/D  |
|                                   | #26               | rhy1713                          | 8.4                   | 0.0596              | 2.5                   | 0.1596              | 1.266 | 0.03 |
|                                   | PrD <sup>N</sup>  | rhy1713                          | N/D                   | N/D                 | N/D                   | N/D                 | N/D   | N/D  |
|                                   | PrD <sup>Q</sup>  | rhy1713                          | N/D                   | N/D                 | N/D                   | N/D                 | N/D   | N/D  |

\* exceeded sensitivity of assay

‡ not cell cycle-arrested

† multimodal

Table S2. Plasmids and polypeptide sequences used in this study, related to STAR Methods.

| vector                                                     | derived plasmid | insert                                                                                                                                                                                                                                                                                                                                                                                                                                                                                                                                                                           | fusion protein sequence                                                                                                                                                                                                                                                                                                                                                                                                                                                                           |
|------------------------------------------------------------|-----------------|----------------------------------------------------------------------------------------------------------------------------------------------------------------------------------------------------------------------------------------------------------------------------------------------------------------------------------------------------------------------------------------------------------------------------------------------------------------------------------------------------------------------------------------------------------------------------------|---------------------------------------------------------------------------------------------------------------------------------------------------------------------------------------------------------------------------------------------------------------------------------------------------------------------------------------------------------------------------------------------------------------------------------------------------------------------------------------------------|
| V08<br>(encodes linker + mEos3.1 at C-terminus of insert)  | rhx1111         | sesA                                                                                                                                                                                                                                                                                                                                                                                                                                                                                                                                                                             | MSEATVSELISSTIKSLEEGIRCHKDVEDDNLREAFHEAGRGLSVVNQALQAAQGNAREPQSAMN<br>PLRVCNTKANISASIFKAVAQAPKTSRFEYGEAVRQEGNGQTVLEVLVVGMMDKVCALAENFAIQDQ<br>VKKLHETIEKLSAMKPSLPKEGPGHTFTNIGNGNQYNATDGPQINQGGNQVTGGTFPGTVNFGSPW<br>PQNPPFEHRNGAEAAAREAAAREAAAREAAAREAAAREAAAREAAAREAAAREAAAREAAAREAAARE<br>FEGKQSMDELVKEGGPLPFAFDILTAFHYGNRVFAKYPDNIQDYFKQSFPGKYSWERSLTFEDGGIC<br>NARNDITMEGDTFYNKVRFYGTNFPANGPVMQKKTWKWEPSTEKMYVRDGLTGDVEMALLLEGNA<br>HYRCDFRTTYKAKEKGVKLPGAHFVDHCIEILSHDKDYNKVKLYEHAVAHSGLPDNARR |
| BB5b<br>(encodes linker + mEos3.1 at C-terminus of insert) | rhx0927         | ASC                                                                                                                                                                                                                                                                                                                                                                                                                                                                                                                                                                              | MSGRARDAILDALENLTAELKKFKLKLKLSVPLREGYGRIPRGALLSMDALDLTDKLVSFYLETYGAELT<br>ANVLRDMGLQEMAGQLQAATHQGSQAAPAGIQAPPQSAAKPGLHFIDQHRAALIARVTNVEWLLDAL<br>YGVKLTDEQYQAVRAEPTNPSKMRKLSFSTPAWNWTCKDLLLQALRESQSYLVEDLERSGAEAAAR<br>EAAAREAAAREAAAREAAAREAAAREAAAREAAAREAAAREAAAREAAAREAAAREAAAREAAARE<br>PFAFDILTAFHYGNRVFAKYPDNIQDYFKQSFPGKYSWERSLTFEDGGICNARNDITMEGDTFYNKV<br>RFGTNPANGPVMQKKTWKWEPSTEKMYVRDGLTGDVEMALLLEGNAHYRCDFRTTYKAKEKGVK<br>LPGAHFVDHCIEILSHDKDYNKVKLYEHAVAHSGLPDNARR                 |
|                                                            | rhx0935         | mEos3.1                                                                                                                                                                                                                                                                                                                                                                                                                                                                                                                                                                          | MSAIKPDMKIKLRMEGNVNGHHFVIDGDGTGKPFEGKQSMDELVKEGGPLPFAFDILTAFHYGNRVF<br>AKYPDNIQDYFKQSFPGKYSWERSLTFEDGGICNARNDITMEGDTFYNKVRFYGTNFPANGPVMQK<br>KTLKWEWEPSTEKMYVRDGLTGDVEMALLLEGNAHYRCDFRTTYKAKEKGVKLPGAHFVDHCIEILSHD<br>KYNKVKLYEHAVAHSGLPDNARR                                                                                                                                                                                                                                                     |
|                                                            | rhx0952         | HETs PrD                                                                                                                                                                                                                                                                                                                                                                                                                                                                                                                                                                         | MSKIDAIVGRNSAKDIRTEERARVQLGNVVTAAALHGGIRISDQTTNSVETVVGKGESRVLIGNEYGGK<br>GFWDNNAFLYKVVVMGCRNSISSSPEAAAREAAAREAAAREAAAREAAARGGGRINGGGGGGAMSAIKPDM<br>KIKLRMEGNVNGHHFVIDGDGTGKPFEGKQSMDELVKEGGPLPFAFDILTAFHYGNRVFAKYPDNIQ<br>DYFKQSFPGKYSWERSLTFEDGGICNARNDITMEGDTFYNKVRFYGTNFPANGPVMQKKTWKWEPST<br>EKMYVRDGLTGDVEMALLLEGNAHYRCDFRTTYKAKEKGVKLPGAHFVDHCIEILSHDKDYNKVKLY<br>EHAVAHSGLPDNARR                                                                                                          |
|                                                            | rhx1543         | HETs PrD(W287A)                                                                                                                                                                                                                                                                                                                                                                                                                                                                                                                                                                  | MSKIDAIVGRNSAKDIRTEERARVQLGNVVTAAALHGGIRISDQTTNSVETVVGKGESRVLIGNEYGGK<br>GFADNNAFLYKVVVMGCRNSISSSPEAAAREAAAREAAAREAAAREAAARGGGRINGGGGGGAMSAIKPDMK<br>IKLRMEGNVNGHHFVIDGDGTGKPFEGKQSMDELVKEGGPLPFAFDILTAFHYGNRVFAKYPDNIQD<br>YFKQSFPGKYSWERSLTFEDGGICNARNDITMEGDTFYNKVRFYGTNFPANGPVMQKKTWKWEPSTE<br>KMYVRDGLTGDVEMALLLEGNAHYRCDFRTTYKAKEKGVKLPGAHFVDHCIEILSHDKDYNKVKLYE<br>HAVAHSGLPDNARR                                                                                                          |
|                                                            | rhx0974         | SUP35 PrD                                                                                                                                                                                                                                                                                                                                                                                                                                                                                                                                                                        | MSDSNQGNNQQNYQQYSQNGNQQQGNRYQGYQAYNAQAQAPAGGYQNYQQYSGYQQGGYQQ<br>YNPDAGYQQQYNPQGGYQQYNPQGGYQQQFNPQGGRGNYKNFNYNLQGYQAGFQPPQSQGM<br>SLNDFQKQKQCDPAFLYKVVVMGCRNSISSSPEAAAREAAAREAAAREAAAREAAARGGGRINGGGGGAM<br>SAIKPDMKIKLRMEGNVNGHHFVIDGDGTGKPFEGKQSMDELVKEGGPLPFAFDILTAFHYGNRVFA<br>KYPDNIQDYFKQSFPGKYSWERSLTFEDGGICNARNDITMEGDTFYNKVRFYGTNFPANGPVMQKKT<br>LKWEPSTEKMYVRDGLTGDVEMALLLEGNAHYRCDFRTTYKAKEKGVKLPGAHFVDHCIEILSHDKD<br>YNKVKLYEHAVAHSGLPDNARR                                           |
|                                                            | rhx1500         | SUP35 PrD(Q61K, Q62K)                                                                                                                                                                                                                                                                                                                                                                                                                                                                                                                                                            | MSDSNQGNNQQNYQQYSQNGNQQQGNRYQGYQAYNAQAQAPAGGYQNYQQYSGYQQGGYQQ<br>YNPDAGYQQQYNPQGGYQQYNPQGGYQQQFNPQGGRGNYKNFNYNLQGYQAGFQPPQSQGM<br>SLNDFQKQKQCDPAFLYKVVVMGCRNSISSSPEAAAREAAAREAAAREAAAREAAARGGGRINGGGGGAM<br>SAIKPDMKIKLRMEGNVNGHHFVIDGDGTGKPFEGKQSMDELVKEGGPLPFAFDILTAFHYGNRVFA<br>KYPDNIQDYFKQSFPGKYSWERSLTFEDGGICNARNDITMEGDTFYNKVRFYGTNFPANGPVMQKKT<br>LKWEPSTEKMYVRDGLTGDVEMALLLEGNAHYRCDFRTTYKAKEKGVKLPGAHFVDHCIEILSHDKD<br>YNKVKLYEHAVAHSGLPDNARR                                           |
|                                                            | rhx1499         | SUP35 PrD(Y46K, Q47K)                                                                                                                                                                                                                                                                                                                                                                                                                                                                                                                                                            | MSDSNQGNNQQNYQQYSQNGNQQQGNRYQGYQAYNAQAQAPAGGYQNYQQYSGYQQGGYQQ<br>YNPDAGYQQQYNPQGGYQQYNPQGGYQQQFNPQGGRGNYKNFNYNLQGYQAGFQPPQSQGM<br>SLNDFQKQKQCDPAFLYKVVVMGCRNSISSSPEAAAREAAAREAAAREAAAREAAARGGGRINGGGGGAM<br>SAIKPDMKIKLRMEGNVNGHHFVIDGDGTGKPFEGKQSMDELVKEGGPLPFAFDILTAFHYGNRVFA<br>KYPDNIQDYFKQSFPGKYSWERSLTFEDGGICNARNDITMEGDTFYNKVRFYGTNFPANGPVMQKKT<br>LKWEPSTEKMYVRDGLTGDVEMALLLEGNAHYRCDFRTTYKAKEKGVKLPGAHFVDHCIEILSHDKD<br>YNKVKLYEHAVAHSGLPDNARR                                           |
| rhx1305                                                    | SUP35 PrD(N)    | MSDSNNGNNNNNNYNNYNNNGNNNNNGNNRYNGYNAYNANANPAGGYNNYNGYSGYNNGGYNNY<br>PDAGYNNNNYNNPNNYNNYNNPNNYNNNFPNNPNNGGRNYKNFNYNLQGYNAGFNPNNSNGMSLND<br>FNKNNKNAAPKPKTKLKVSSSGIKLANATKKGVTKPAESDKKEEESAETKEPTKEPTKVEEPPVKKE<br>EKPVQTEEKTEEKSELPKVEDLKISESTHNTNANVTSADALIKEQEEEVDDVNDNPAFLYKVVVMG<br>CRNSISSSPEAAAREAAAREAAAREAAAREAAARGGGRINGGGGGGAMSAIKPDMKIKLRMEGNVNGHHFVID<br>GDGTGKPFEGKQSMDELVKEGGPLPFAFDILTAFHYGNRVFAKYPDNIQDYFKQSFPGKYSWERSL<br>TFEDGGICNARNDITMEGDTFYNKVRFYGTNFPANGPVMQKKTWKWEPSTEKMYVRDGLTGDVEMA<br>LLEGNHYRCDFRTTYKAKEKGVKLPGAHFVDHCIEILSHDKDYNKVKLYEHAVAHSGLPDNARR |                                                                                                                                                                                                                                                                                                                                                                                                                                                                                                   |





Table S3. Yeast strains used in this study, related to STAR Methods.

| yeast strain | background    | genotype                                                                                                                                                                                                                                                 | plasmotype                                    | parent strain, source       |
|--------------|---------------|----------------------------------------------------------------------------------------------------------------------------------------------------------------------------------------------------------------------------------------------------------|-----------------------------------------------|-----------------------------|
| Y7092        | S288c         | MAT $\alpha$ lyp1 $\Delta$ can1 $\Delta$ ::STE2pr_SpHIS5 his3 $\Delta$ 1 leu2 $\Delta$ 0 ura3 $\Delta$ 0 met15 $\Delta$ 0                                                                                                                                | [PIN <sup>+</sup> ]                           | Tong and Boone 2007         |
| rhy1851      | S288c         | MAT $\alpha$ lyp1 $\Delta$ can1 $\Delta$ ::STE2pr_SpHIS5 his3 $\Delta$ 1 leu2 $\Delta$ 0 ura3 $\Delta$ 0 met15 $\Delta$ 0                                                                                                                                | [pin <sup>-</sup> ]                           | Y7092, this study           |
| rhy1713      | S288c         | MAT $\alpha$ lyp1 $\Delta$ can1 $\Delta$ ::STE2pr_SpHIS5 his3 $\Delta$ 1 leu2 $\Delta$ 0 ura3 $\Delta$ 0 met15 $\Delta$ 0 cln3 $\Delta$ 0::GAL1pr_WHI5_hphMX                                                                                             | [PIN <sup>+</sup> ]                           | Y7092, this study           |
| rhy1852      | S288c         | MAT $\alpha$ lyp1 $\Delta$ can1 $\Delta$ ::STE2pr_SpHIS5 his3 $\Delta$ 1 leu2 $\Delta$ 0 ura3 $\Delta$ 0 met15 $\Delta$ 0 cln3 $\Delta$ 0::GAL1pr_WHI5_hphMX                                                                                             | [pin <sup>-</sup> ]                           | yrh1713, this study         |
| L2910        | 74-D694       | MAT $\alpha$ ade1-14 leu2-3,112 his3 $\Delta$ 200 trp1-289 ura3-52                                                                                                                                                                                       | [pin <sup>-</sup> ]                           | Bradley et al. 2002         |
| L1943        | 74-D694       | MAT $\alpha$ trp1-1 ura3-1 leu2-3,112 his3-11,15 ade2-1 can1-100 met2 $\Delta$ 1 lys2 $\Delta$ 2                                                                                                                                                         | low [PIN <sup>+</sup> ]                       | Bradley et al. 2002         |
| L1945        | 74-D694       | MAT $\alpha$ ade1-14 leu2-3,112 his3 $\Delta$ 200 trp1-289 ura3-52                                                                                                                                                                                       | medium [PIN <sup>+</sup> ]                    | Bradley et al. 2002         |
| L1749        | 74-D694       | MAT $\alpha$ ade1-14 leu2-3,112 his3 $\Delta$ 200 trp1-289 ura3-52                                                                                                                                                                                       | high [PIN <sup>+</sup> ]                      | Bradley et al. 2002         |
| YJW1178      | 74-D694       | MAT $\alpha$ ade1-14 leu2-3,112 his3 $\Delta$ 200 trp1-289 ura3-52                                                                                                                                                                                       | [PIN <sup>+</sup> ] [psi <sup>-</sup> ]       | Tanaka et al. 2006          |
| YJW1180      | 74-D694       | MAT $\alpha$ ade1-14 leu2-3,112 his3 $\Delta$ 200 trp1-289 ura3-52                                                                                                                                                                                       | [PIN <sup>+</sup> ] [PSI <sup>+</sup> strong] | Tanaka et al. 2006          |
| YJW1181      | 74-D694       | MAT $\alpha$ ade1-14 leu2-3,112 his3 $\Delta$ 200 trp1-289 ura3-52                                                                                                                                                                                       | [PIN <sup>+</sup> ] [PSI <sup>+</sup> weak]   | Tanaka et al. 2006          |
| rhy1965      | S288c/74-D694 | MAT $\alpha$ / $\alpha$ lyp1 $\Delta$ /LYP1 can1 $\Delta$ ::STE2pr_SpHIS5/can1-100 his3 $\Delta$ 1/his3-11,15 leu2 $\Delta$ 0/leu2-3,112 ura3 $\Delta$ 0/ura3-1 met15 $\Delta$ 0/MET15 trp1-1/TRP1 ade2-1/ADE2 met2 $\Delta$ 1/MET2 lys2 $\Delta$ 2/LYS2 | low [PIN <sup>+</sup> ]                       | yrh1851 X L1943, this study |
| rhy1966      | S288c/74-D694 | MAT $\alpha$ / $\alpha$ lyp1 $\Delta$ /LYP1 can1 $\Delta$ ::STE2pr_SpHIS5/can1-100 his3 $\Delta$ 1/his3-11,15 leu2 $\Delta$ 0/leu2-3,112 ura3 $\Delta$ 0/ura3-1 met15 $\Delta$ 0/MET15 trp1-1/TRP1 ade2-1/ADE2 met2 $\Delta$ 1/MET2 lys2 $\Delta$ 2/LYS2 | medium [PIN <sup>+</sup> ]                    | yrh1851 X L1945, this study |
| rhy1967      | S288c/74-D694 | MAT $\alpha$ / $\alpha$ lyp1 $\Delta$ /LYP1 can1 $\Delta$ ::STE2pr_SpHIS5/can1-100 his3 $\Delta$ 1/his3-11,15 leu2 $\Delta$ 0/leu2-3,112 ura3 $\Delta$ 0/ura3-1 met15 $\Delta$ 0/MET15 trp1-1/TRP1 ade2-1/ADE2 met2 $\Delta$ 1/MET2 lys2 $\Delta$ 2/LYS2 | high [PIN <sup>+</sup> ]                      | yrh1851 X L1749, this study |

## Method S1

Developing a technique to detect nucleation of proteins *in vivo* required a few moving parts to come together. The necessity to acquire single-cell measurements across large cell populations while also determining cytosolic volume and protein localization within each cell led us to imaging flow cytometry as the appropriate platform (Basiji and O’Gorman, 2015).

Ensuring experimental independence of each cell required that we restrict intercellular interactions. We therefore employed the unicellular eukaryote, budding yeast. Notably, yeast cell walls are impermeable to extracellular amyloids and prion-containing exosomes (Kabani and Melki, 2015; King and Diaz-Avalos, 2004) whereas cultured mammalian cells readily internalize these structures (Grassmann et al., 2013). We eliminated the additional possibility of mitotic inheritance of nucleated assemblies by genetically inducing cell cycle arrest during query protein expression (see Fig. 1C and Method Details). In short, every cell of the resulting yeast strain can be considered as an independent, femtoliter-volume vessel for protein assembly. We, therefore, created an *in vivo* system that allows for measurements that have not yet been attempted *in vitro* let alone *in vivo*.

Measuring protein self-assembly requires a sensitive reporter that scales with the order of assembly and one that is reproducible across experiments. Many techniques were considered for the reporter. Förster Resonance Energy Transfer (FRET) occurs between two fluorophores that have overlapping spectra, when in close proximity. FRET is widely used to detect interactions between two corresponding protein species fused to those fluorophores (Jares-Erijman and Jovin, 2003). However, creating the two fusions for each protein, and expressing them to the same ratio in all cells across a range of expression levels, would be exceedingly difficult. We likewise excluded protein complementation and two hybrid assays from consideration. Available approaches that use a single fusion protein to detect self-assembly, such as fluorescence anisotropy and enzyme loss of function assays, were not considered due to their limited dynamic range and throughput.

We reasoned that high-throughput, sensitized emission FRET between complementary fluorophores could be realized if they were both expressed from the same genetic construct. Individual molecules of the fusion protein would have to mature stochastically into one or the other fluorophore, resulting in a mixture of the two at the cellular level. This ensured a consistent ratio of donor to acceptor molecules, regardless of the expression level of the protein. We further reasoned that photoconvertible fluorescent proteins could be employed for this purpose (Wolf et al., 2013). After testing several, we chose to proceed with mEos3.1, a monomeric bright green fluorescent protein that can be converted irreversibly to a bright red fluorescent form upon illumination with violet light (Zhang et al., 2012). Importantly, the emission spectrum of the green form (solid curves) strongly overlaps (shaded in yellow) with the excitation spectrum of the red form (dotted curves), as necessary for FRET to occur (Fig. 1A). The ratio of green to red molecules and thereby the sensitivity of the mixture to self-assembly can be precisely controlled by modulating the intensity and duration of violet light

exposure. We term this approach Amphifluoric FRET (AmFRET) due to the dual nature of the fluorescent moiety.

To detect nucleation barriers, we needed to evaluate the distribution of AmFRET values, or DAmFRET, across a wide range of intracellular protein concentrations. We therefore inducibly expressed mEos3.1 fusion proteins from an episomal plasmid whose copy number varies more than one hundred fold between cells (Fig. 1B; Futcher and Cox, 1984; Loison et al., 1989). After eighteen hours of protein expression (driven by an inducible *GAL1* promoter) in galactose medium, cell cultures were uniformly illuminated with violet light to convert a fraction of mEos3.1 molecules from the green (donor) to the red (acceptor) form (Fig. 1C). We limited the illumination to an empirically optimized dose that yielded maximum FRET intensity. We established that photoconversion efficiency was insensitive to expression level as well as to the identity and structure of the fusion partner (Fig. S1B) and did not vary between cells (Fig. S1C), enabling us to indirectly measure total protein levels as the product of intensity of acceptor fluorescence and an empirically determined molecular brightness and photoconversion factor (see Method Details). We then divided each cell's total protein level by its approximate cytosolic volume as calculated from the bright-field image to derive absolute protein concentrations. We used the ratio of acceptor fluorescence when excited indirectly (at 488 nm) to directly (at 561 nm) to approximate FRET efficiency, and refer to this ratio as simply, "AmFRET".
